# Supplementary material
Source: PubMed Central journal article supplement (PMC2839885)

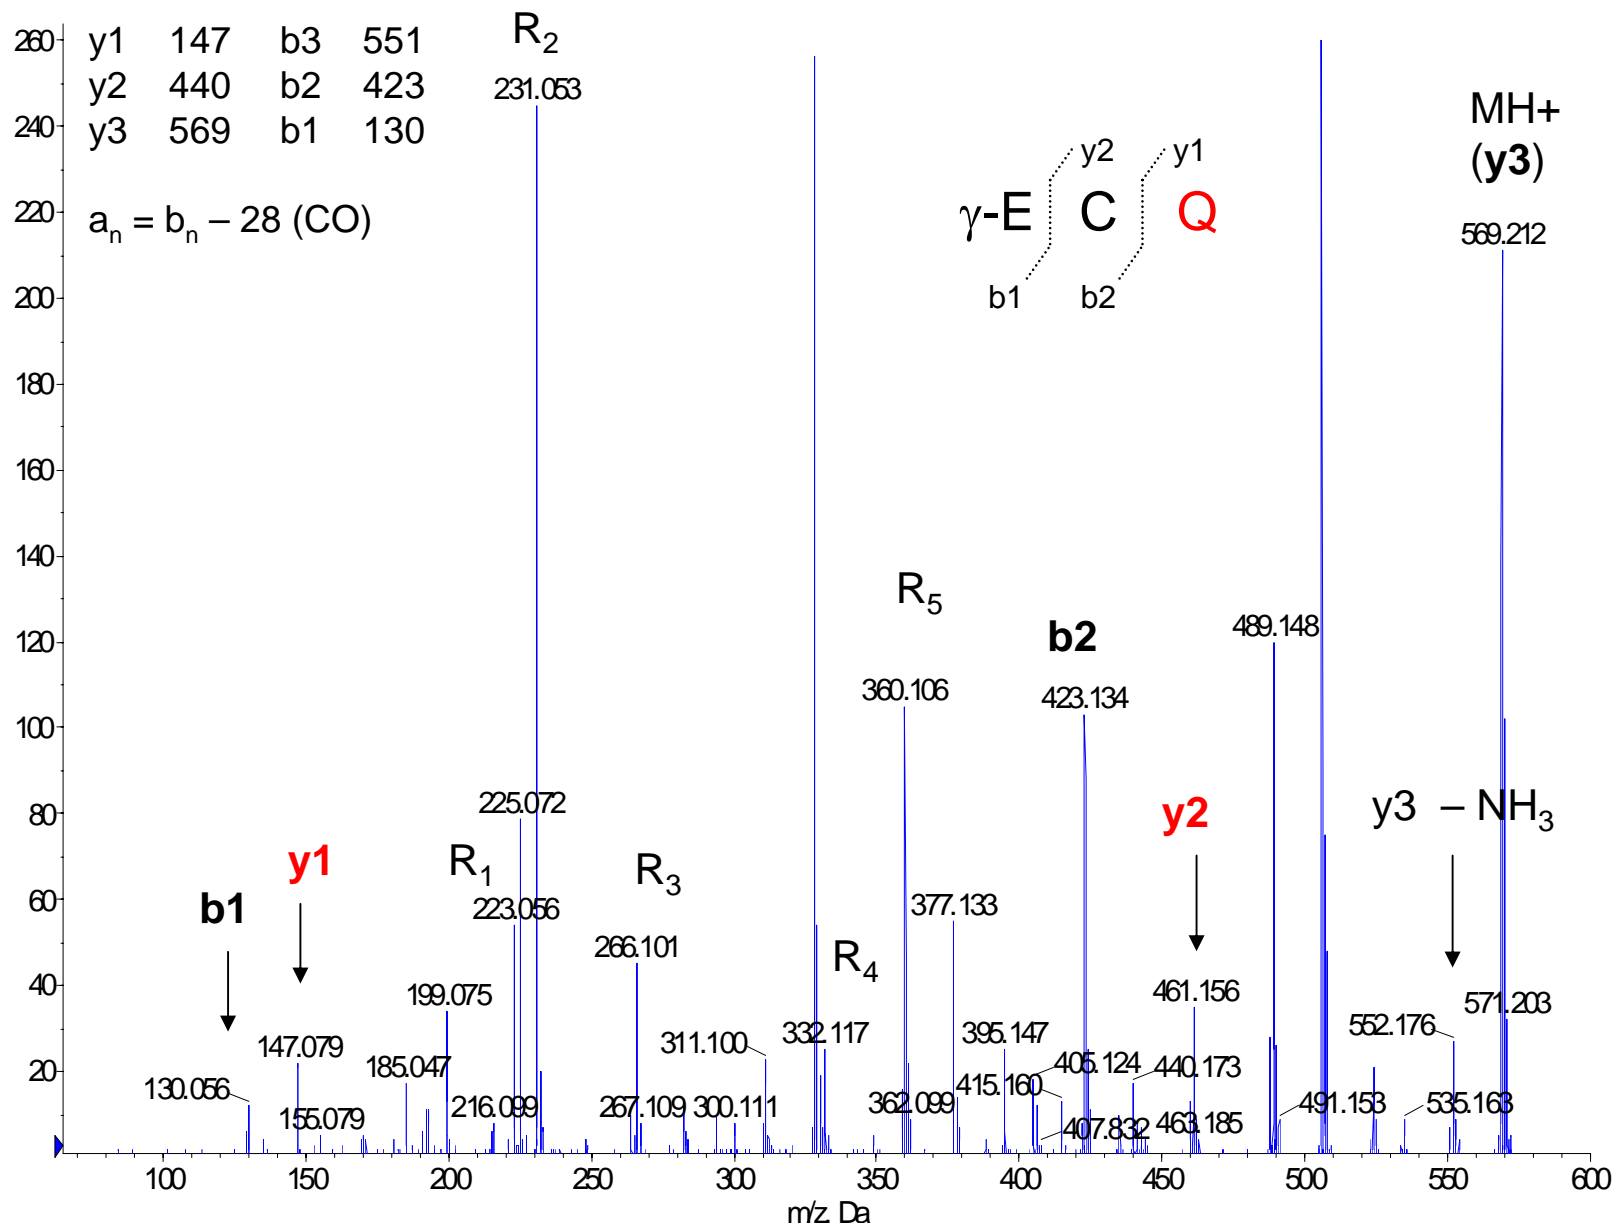

Supplementary figure 1

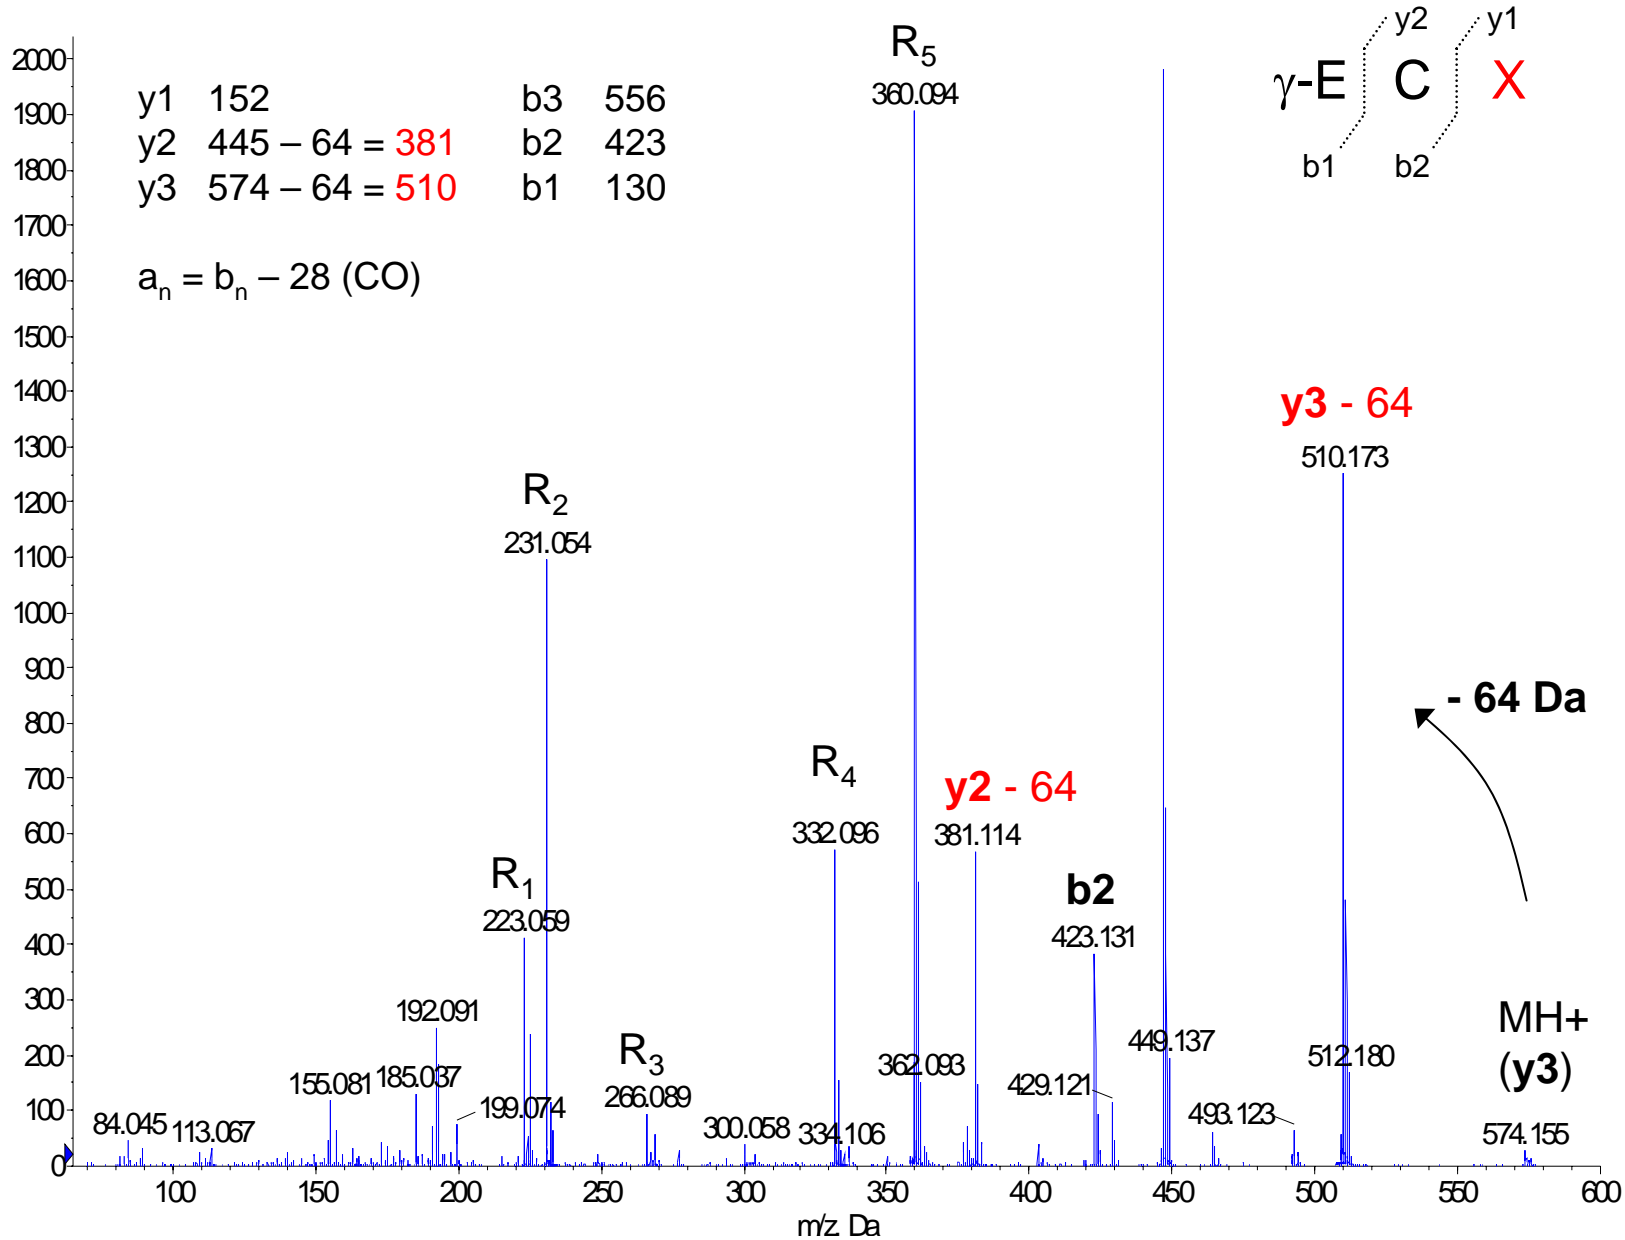

Supplementary figure 2

Supplement: NIHMS181922-supplement-supplementary_files.pdf [file NIHMS181922-supplement-supplementary_files.pdf]
